# Supplementary material
Source: publisher figshare collection journal article supplement (https://springernature.figshare.com/ndownloader/files/20734848)

## **Supplement 1:**

**Supplement 2:**

**
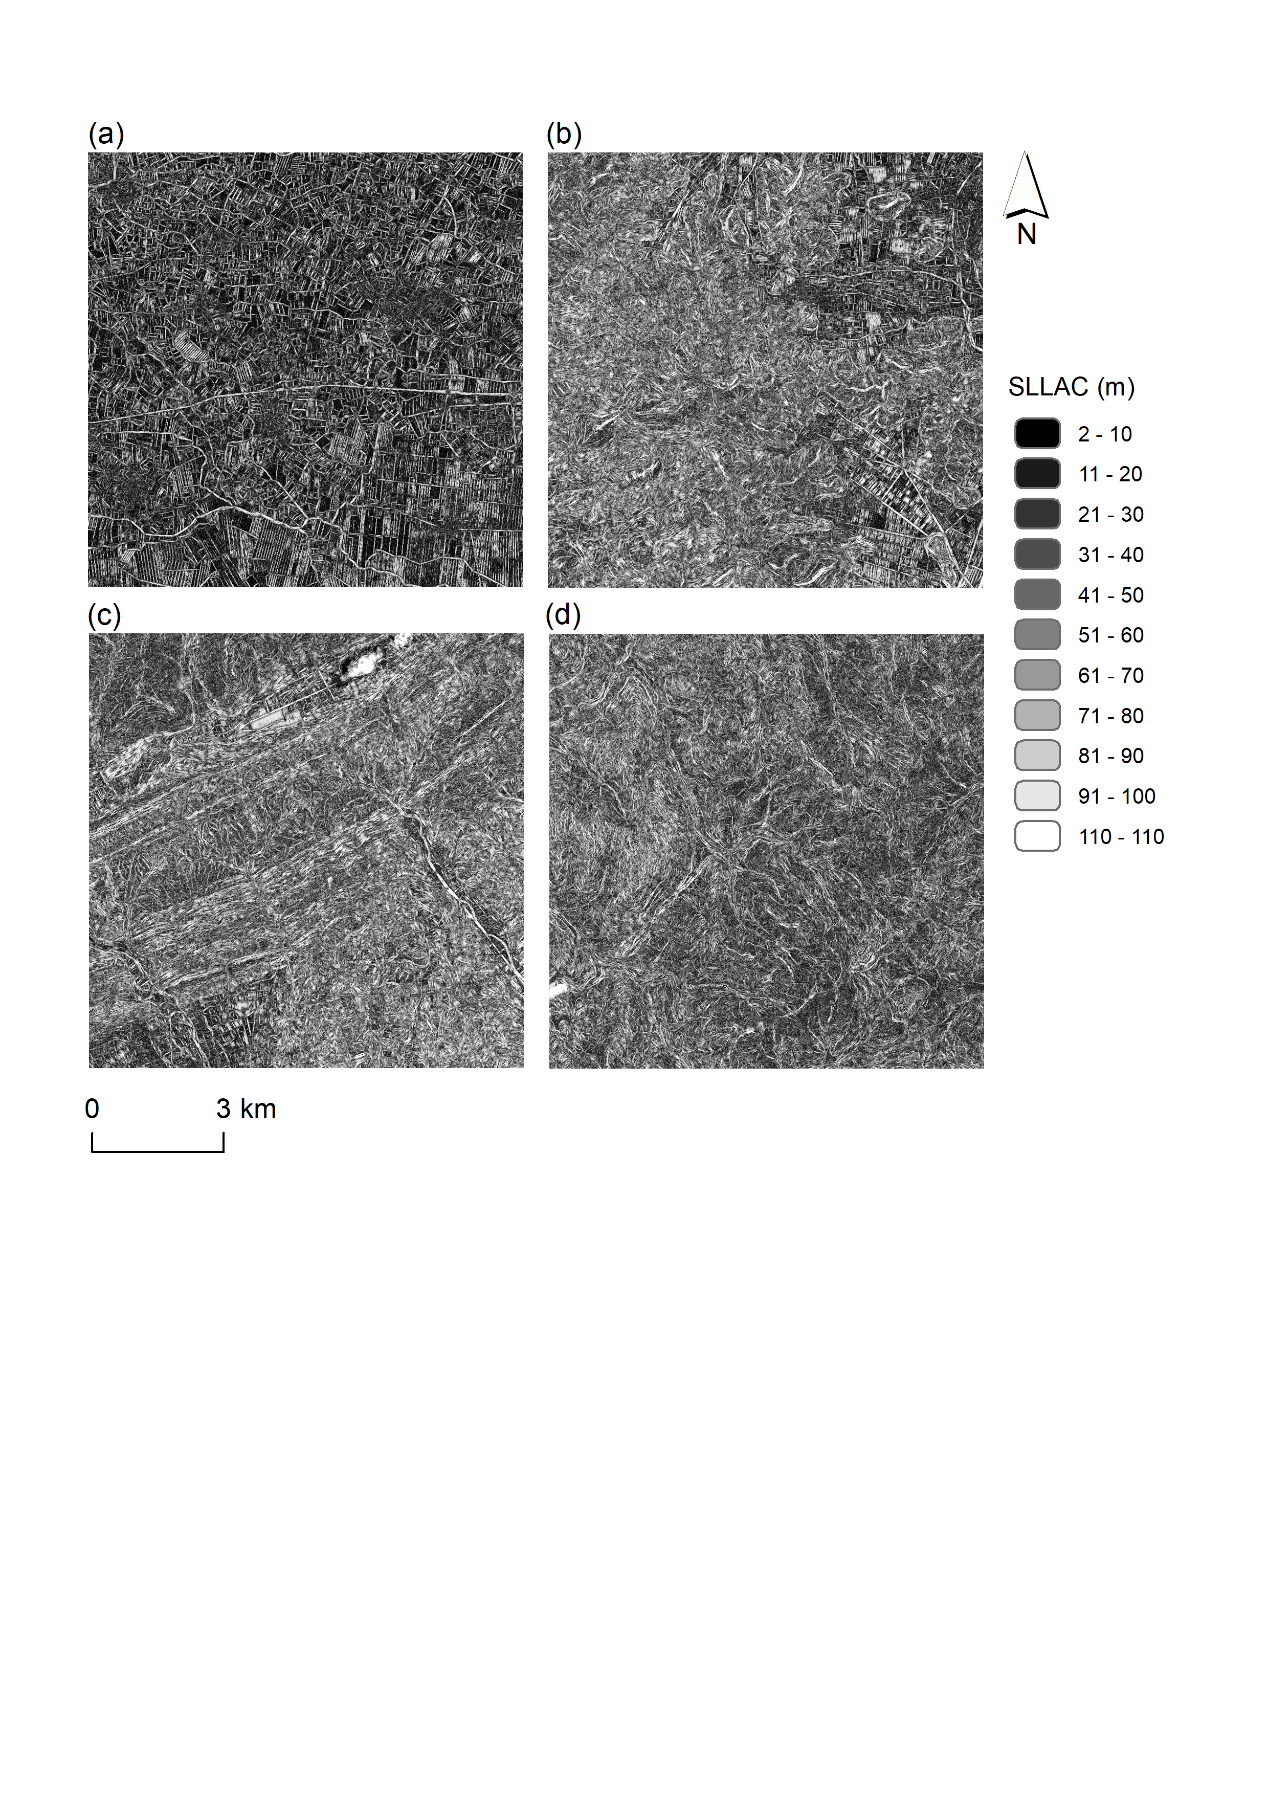
**

Supplement: Supplementary file 1 [file 20734848]
